# Supplementary material
Source: PubMed Central journal article supplement (PMC8935971)
Supplement: mmc1.pdf [file mmc1.pdf]

| Page | Topic        | Question                                                                                                                                                                                                                                                                                                                                                                                                                                                                                                                                                                                                                                                                                                                                                                                                                                                                                                                                                                                                                                                                                                                                                                                                                                                                                                                                                                                                                                                                                                                                                                                                                                                                                                                                                                                                                                                                                                                                                                                                                                                                                                                                                                                                       |
|------|--------------|----------------------------------------------------------------------------------------------------------------------------------------------------------------------------------------------------------------------------------------------------------------------------------------------------------------------------------------------------------------------------------------------------------------------------------------------------------------------------------------------------------------------------------------------------------------------------------------------------------------------------------------------------------------------------------------------------------------------------------------------------------------------------------------------------------------------------------------------------------------------------------------------------------------------------------------------------------------------------------------------------------------------------------------------------------------------------------------------------------------------------------------------------------------------------------------------------------------------------------------------------------------------------------------------------------------------------------------------------------------------------------------------------------------------------------------------------------------------------------------------------------------------------------------------------------------------------------------------------------------------------------------------------------------------------------------------------------------------------------------------------------------------------------------------------------------------------------------------------------------------------------------------------------------------------------------------------------------------------------------------------------------------------------------------------------------------------------------------------------------------------------------------------------------------------------------------------------------|
| 1    | Introduction | <p><b>Have you had a baby in the last three years? We would really like to hear about your experience!</b></p> <p>We are doing this study to find out about women's labour and birth experiences in a number of different countries worldwide. Your answers will help us to compare what women think about care during birth in different countries. We hope to use the results to find out about what women think works well, and to improve care in future.</p> <p>We are a group of healthcare researchers working on a large research project called Babies Born Better (B3) (<a href="http://www.babiesbornbetter.org">www.babiesbornbetter.org</a>). The survey was started as part of an EU funded project. It is now managed by the University of Central Lancashire (UCLan) in the UK, supported by a steering group of people from a range of different countries.</p> <p>If you would like to take part, please fill in our online survey. You will not be asked more than 28 questions. These should take no more than 20 minutes to answer. Please read the questions through and answer as honestly as possible. We would like to know about the care you had for your youngest (most recently born) child.</p> <p>Privacy and confidentiality are very important to us. We aim to only collect anonymous data. If you do provide any information which could be used to identify you, we will store this securely. Your answers will only be used for research and/or development of maternity care services. You can withdraw from the study at any time before you submit the survey by closing the browser window. None of your answers will be saved if you do this. After you have submitted, you will not be able to withdraw from the study.</p> <p>We will post the findings online and will update them regularly. Please visit our website to see what we have found out (<a href="http://www.babiesbornbetter.org">www.babiesbornbetter.org</a>).</p> <p>If you live in a country which is home to one or more of our research partners, we will share your answers with these partners so they can improve care in your country. A list of research partners in each country is</p> |

|   |                                                           |                                                                                                                                                                                                                                                                                                                                                                                                                                                                                                                                                                                                                                                                                                                                                                                                                                                                                                                                                                                                                                                                                                                                                                                                                                                                                                                                                                                                                                                                                                                                                                                                                                                                    |
|---|-----------------------------------------------------------|--------------------------------------------------------------------------------------------------------------------------------------------------------------------------------------------------------------------------------------------------------------------------------------------------------------------------------------------------------------------------------------------------------------------------------------------------------------------------------------------------------------------------------------------------------------------------------------------------------------------------------------------------------------------------------------------------------------------------------------------------------------------------------------------------------------------------------------------------------------------------------------------------------------------------------------------------------------------------------------------------------------------------------------------------------------------------------------------------------------------------------------------------------------------------------------------------------------------------------------------------------------------------------------------------------------------------------------------------------------------------------------------------------------------------------------------------------------------------------------------------------------------------------------------------------------------------------------------------------------------------------------------------------------------|
|   |                                                           | <p>available on our website (<a href="http://www.babiesbornbetter.org">www.babiesbornbetter.org</a>). This includes contact details for each partner organization.</p> <p>By completing the survey, you are consenting for us to share your data with our partners. If you live in a country outside the European Economic Area (EEA), we are required by law to inform you that this may result in your data not being protected to the same standard as it is within the EEA. However, we require all our partners to adhere to a management protocol which ensures your data is protected as much as possible. You can withdraw your consent to share data with our partners at any time, but we will only be able to act on this if we can identify your answers.</p> <p>For more information about how the University uses and protects your data (including your rights and our contact details) please see the Data Protection pages on our website (<a href="https://www.uclan.ac.uk/data_protection/privacy-notice-research-participants.php">https://www.uclan.ac.uk/data_protection/privacy-notice-research-participants.php</a>).</p> <p>Every answer is important – thank you for taking the time to complete this survey!</p> <p>If you have any questions about this survey then please contact us directly (<a href="mailto:admin@babiesbornbetter.org">admin@babiesbornbetter.org</a>)</p> <p>If you have any concerns about the way we have done this study, or about anyone involved in doing it, please contact the UCLan University Officer for Ethics at <a href="mailto:OfficerForEthics@uclan.ac.uk">OfficerForEthics@uclan.ac.uk</a>.</p> |
| 2 | Eligibility                                               | <p>Have you given birth within the last three years?</p> <ul style="list-style-type: none"> <li>• Yes</li> <li>• No</li> </ul>                                                                                                                                                                                                                                                                                                                                                                                                                                                                                                                                                                                                                                                                                                                                                                                                                                                                                                                                                                                                                                                                                                                                                                                                                                                                                                                                                                                                                                                                                                                                     |
| 3 | If you have not given birth in the last three years       | <p>Thank you for your interest in this survey. At the moment, we are only finding out about women who have given birth in the last three years. Please do not complete the rest of the questions. You are welcome to add any comments you want to leave in the comments section on the next page.</p>                                                                                                                                                                                                                                                                                                                                                                                                                                                                                                                                                                                                                                                                                                                                                                                                                                                                                                                                                                                                                                                                                                                                                                                                                                                                                                                                                              |
| 4 | About you                                                 | <p>What was your age when your youngest baby was born?</p> <p>What country do you live in?</p> <p>What place/town/city do you live in?</p> <p>We would like to know about the quality of maternity care provided to all women, including those who were not born in this country but have moved here. Were you born in this country?</p> <ul style="list-style-type: none"> <li>• Yes</li> <li>• No</li> </ul>                                                                                                                                                                                                                                                                                                                                                                                                                                                                                                                                                                                                                                                                                                                                                                                                                                                                                                                                                                                                                                                                                                                                                                                                                                                     |
| 5 | If you were not born in the country you are now living in | <p>Which country were you born in?<br/>(<i>List of countries</i>)</p>                                                                                                                                                                                                                                                                                                                                                                                                                                                                                                                                                                                                                                                                                                                                                                                                                                                                                                                                                                                                                                                                                                                                                                                                                                                                                                                                                                                                                                                                                                                                                                                              |
|   | Migration                                                 | <p>How many years have you been in the country where you are now living?</p>                                                                                                                                                                                                                                                                                                                                                                                                                                                                                                                                                                                                                                                                                                                                                                                                                                                                                                                                                                                                                                                                                                                                                                                                                                                                                                                                                                                                                                                                                                                                                                                       |

|          |                       |                                                                                                                                                                                                                                                                                           |
|----------|-----------------------|-------------------------------------------------------------------------------------------------------------------------------------------------------------------------------------------------------------------------------------------------------------------------------------------|
|          |                       | <p>Why did you move to this country?</p> <ul style="list-style-type: none"> <li>• As a child with parents</li> <li>• Work</li> <li>• Education</li> <li>• Family reunion/ Partnership</li> <li>• Refuge/ Asylum seeking</li> <li>• Other (please tell us why in the box below)</li> </ul> |
| <b>6</b> | Your civil status     | <p>Are you currently:</p> <ul style="list-style-type: none"> <li>○ Married or in a relationship, cohabiting</li> <li>○ In a partnership, not cohabiting</li> <li>○ Single or not living with a partner</li> <li>○ Other (please describe)</li> </ul>                                      |
| <b>7</b> | Your education        | <p>Please indicate highest level of education you have completed</p> <ul style="list-style-type: none"> <li>• No formal schooling</li> <li>• Primary education</li> <li>• Secondary education</li> <li>• Tertiary/professional/technical</li> <li>• University or equivalent</li> </ul>   |
| <b>8</b> | Your employment       | <p>Are you currently:</p> <ul style="list-style-type: none"> <li>○ Student</li> <li>○ Employed</li> <li>○ Freelance/self-employed</li> <li>○ Unemployed</li> <li>○ Other</li> </ul>                                                                                                       |
| <b>9</b> | Your standard of life | <p>Compared to most people in this country, I think my standard of life is:</p> <ul style="list-style-type: none"> <li>• Much worse</li> <li>• Below average</li> <li>• Average</li> <li>• Above average</li> <li>• Much better</li> </ul>                                                |

|    | Topic/question                 | New survey                                                                                                                                                                                                                                                                                                                                   |
|----|--------------------------------|----------------------------------------------------------------------------------------------------------------------------------------------------------------------------------------------------------------------------------------------------------------------------------------------------------------------------------------------|
| 10 | About your children            | How many children have you given birth to?                                                                                                                                                                                                                                                                                                   |
| 11 | If you have no children        | Thank you for your interest in this survey. At the moment, we are only finding out about women who have given birth in the last three years. Please feel free to provide your views on maternity care in the comments section on the next page.                                                                                              |
| 12 | About your youngest child(ren) | What is the date of birth of your youngest child(ren)? <ul style="list-style-type: none"> <li>• Date of birth</li> <li>• month</li> <li>• year</li> </ul>                                                                                                                                                                                    |
|    | How many children              | Did you give birth to more than one child at this time?                                                                                                                                                                                                                                                                                      |
| 13 | Weeks of pregnancy             | How many weeks pregnant were you when your youngest child was born? If you aren't sure please tell us approximately <ul style="list-style-type: none"> <li>• Weeks</li> </ul>                                                                                                                                                                |
| 14 | Wellbeing                      | Did you experience problems_during the pregnancy? <ul style="list-style-type: none"> <li>• Yes</li> <li>• no</li> </ul> <p>If Yes, were they:</p> <ul style="list-style-type: none"> <li>• Minor non-medical problems</li> <li>• Minor medical problems</li> <li>• Severe non-medical problems</li> <li>• Severe medical problems</li> </ul> |

|    |                                     |                                                                                                                                                                                                                                                                                                                                                                                                                                                                                                                                                                                                                                                                                                              |
|----|-------------------------------------|--------------------------------------------------------------------------------------------------------------------------------------------------------------------------------------------------------------------------------------------------------------------------------------------------------------------------------------------------------------------------------------------------------------------------------------------------------------------------------------------------------------------------------------------------------------------------------------------------------------------------------------------------------------------------------------------------------------|
| 15 | How your baby was born              | How was your most recent baby born? <ul style="list-style-type: none"> <li>○ Normally with no assistance</li> <li>○ With the help of ventouse (suction) or forceps</li> <li>○ By a caesarean section, planned in pregnancy</li> <li>○ By a caesarean section, due to an emergency in labour</li> <li>○ Other (please describe)</li> </ul>                                                                                                                                                                                                                                                                                                                                                                    |
| 16 | Where you had your labour and birth | Where did the labour and birth of your last baby take place? (If you had to change the setting during birth, please tick all places you were in) <ul style="list-style-type: none"> <li>• In a hospital</li> <li>• In a birth centre that is part of a hospital</li> <li>• In a birth centre that is not part of a hospital</li> <li>• At your home</li> <li>• Other (please specify)</li> </ul> <p>How was your care funded?</p> <ul style="list-style-type: none"> <li>• Public, funded by taxes (I didn't have to pay at the time of birth)</li> <li>• Private, funded by self or insurance (I had to pay before or after the birth)</li> <li>• I don't know</li> <li>• Other (please specify)</li> </ul> |
|    |                                     | Which country did you give birth in?                                                                                                                                                                                                                                                                                                                                                                                                                                                                                                                                                                                                                                                                         |
|    |                                     | Please write down where you had your last baby (if this was your home, please don't write down anything that can identify your address) <ul style="list-style-type: none"> <li>▪ Name of institution</li> <li>▪ Town</li> </ul> <p>If you know or can find out the postcode, please add it here</p> <ul style="list-style-type: none"> <li>▪ Postcode</li> </ul>                                                                                                                                                                                                                                                                                                                                             |
|    |                                     | Which health care provider made most of the decisions with you during your labour and birth? <ul style="list-style-type: none"> <li>○ Doctor</li> </ul>                                                                                                                                                                                                                                                                                                                                                                                                                                                                                                                                                      |

|    |                                               |                                                                                                                                                                                                                                                                                                                                                                                                                                                                                                                                                                                                                                                                                                                      |
|----|-----------------------------------------------|----------------------------------------------------------------------------------------------------------------------------------------------------------------------------------------------------------------------------------------------------------------------------------------------------------------------------------------------------------------------------------------------------------------------------------------------------------------------------------------------------------------------------------------------------------------------------------------------------------------------------------------------------------------------------------------------------------------------|
|    |                                               | <ul style="list-style-type: none"> <li>○ Midwife</li> <li>○ Nurse</li> <li>○ A combination of a midwife and doctor or a nurse and a doctor (Please explain the nature of this care in the box below)</li> <li>○ Other (please explain below)</li> </ul>                                                                                                                                                                                                                                                                                                                                                                                                                                                              |
| 17 | <b>What went well?</b>                        | <p>In the place where you gave birth, what were the three most positive experiences of your care? Please put the very best thing at the top of the list. (You do not need to fill in all boxes. If you have no positive experiences, please write 'none' in the first box)</p> <ul style="list-style-type: none"> <li>▪ First</li> <li>▪ Second</li> <li>▪ Third</li> </ul>                                                                                                                                                                                                                                                                                                                                          |
|    |                                               | <p>What do you think could have made your experience better? (You do not need to fill in all boxes. If you have no suggestions, please write 'none' in the first box)</p> <ul style="list-style-type: none"> <li>• First</li> <li>▪ Second</li> <li>▪ Third</li> </ul>                                                                                                                                                                                                                                                                                                                                                                                                                                               |
| 18 | <b>Your advice to someone you care about</b>  | <p>Imagine you are talking to a very close friend or family member who is pregnant, and that she is trying to decide where to give birth to her baby. She asks you what you think about the place you gave birth. Please answer her by finishing one or both of the following sentences:</p> <ul style="list-style-type: none"> <li>▪ I think you should give birth at the place where I did because...</li> <li>▪ I think you should not give birth at the place where I did because...</li> </ul>                                                                                                                                                                                                                  |
| 19 | <b>Your overall childbirth experience</b>     | <p>How do you feel about your labour and birth experience?</p> <ul style="list-style-type: none"> <li>○ It was mostly a very good experience</li> <li>○ It was mostly quite a good experience</li> <li>○ Some of it was good, some of it was bad</li> <li>○ It was mostly quite a bad experience</li> <li>○ It was mostly a very bad experience</li> </ul>                                                                                                                                                                                                                                                                                                                                                           |
| 20 | <b>Covid-19 crisis</b>                        | <p>Did you have your baby during the covid-19 crisis?</p> <ul style="list-style-type: none"> <li>• Yes</li> <li>• No</li> </ul>                                                                                                                                                                                                                                                                                                                                                                                                                                                                                                                                                                                      |
| 21 | <b>Other comments</b>                         | <p>Please write any comments you want to make here. These could explain your answers in more detail, or add any other information you would like us to know about your experiences with maternity care.</p>                                                                                                                                                                                                                                                                                                                                                                                                                                                                                                          |
| 22 | <b>Future research</b>                        | <p>We would like to contact women who have completed this survey to ask them if they want to take part in future studies related to their maternity care experiences and views. If you are happy for the researchers to contact you, please go back to the Babies Born Better website (<a href="http://www.babiesbornbetter.org">www.babiesbornbetter.org</a>) where you can leave your email. We will not use your email for any other purpose and your email cannot be linked to your response to this survey.</p>                                                                                                                                                                                                 |
| 23 | <b>How did you find out about the survey?</b> | <p>How did you find out about the survey?</p> <ul style="list-style-type: none"> <li>○ Facebook</li> <li>○ Twitter</li> <li>○ Forum</li> <li>○ My midwife or maternity care provider</li> <li>○ Parents' organization</li> <li>○ Other (please specify)</li> </ul>                                                                                                                                                                                                                                                                                                                                                                                                                                                   |
|    | <b>End of survey</b>                          | <p>Thank you very much for letting us know about your views and experiences. Every response is important, and we are very grateful for your help.</p> <p>Please visit our Facebook page (<a href="https://www.facebook.com/Babies-Born-Better-562801170483935/">https://www.facebook.com/Babies-Born-Better-562801170483935/</a>) if you would like to meet other people who are trying to improve maternity care across Europe and the rest of the world. You can also follow us on Twitter (<a href="https://twitter.com/babysbornbetter">#babysbornbetter</a>).</p> <p>We understand that some women may have had negative experiences during their maternity care. If you would like to be put in touch with</p> |

support networks in your area or country, please tell us. We will then try to let you know who you can contact for help and advice. In some countries, independent support networks exist. Please visit (*insert link*) to see if there is a support network in your area.

This survey has passed the ethics approval process of the University of Central Lancashire, UK. All personal data, in digital or hard copy form, will be stored and handled in accordance with the UK Data Protection Act (1998) as well as the University of Central Lancashire (UK) guidelines. This means collected data will be secure and only designated researchers will have access to confidential information and data. The information you have given us is completely confidential, unless you agree to make it identifiable. It will be used for academic and policy development/service improvement purposes only. By completing this survey, you give your consent for the research team to use submitted information for these purposes.

If you have any questions about this survey then please contact us directly at [contact@babiesbornbetter.org](mailto:contact@babiesbornbetter.org)

If you have any concerns about the conduct of the study or the individuals involved, please address these concerns to the UCLan University Officer for Ethics at [OfficerForEthics@uclan.ac.uk](mailto:OfficerForEthics@uclan.ac.uk)
